# Supplementary figures and images for: Integrated miRNA and mRNA profiling of tumor‐educated macrophages identifies prognostic subgroups in estrogen receptor‐positive breast cancer
Source: PubMed Central journal article supplement — Mol Oncol. 2014 Aug 16;9(1):155–66. doi: 10.1016/j.molonc.2014.07.023 (PMC5528681; doi:10.1016/j.molonc.2014.07.023), 2014-08-16

# Supplementary Figure 2:

## Oxford dataset:

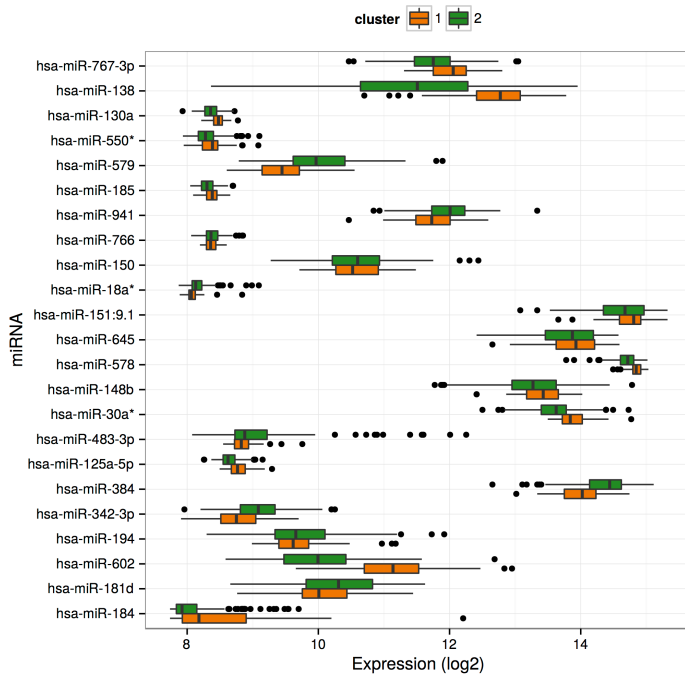

## Odense dataset:

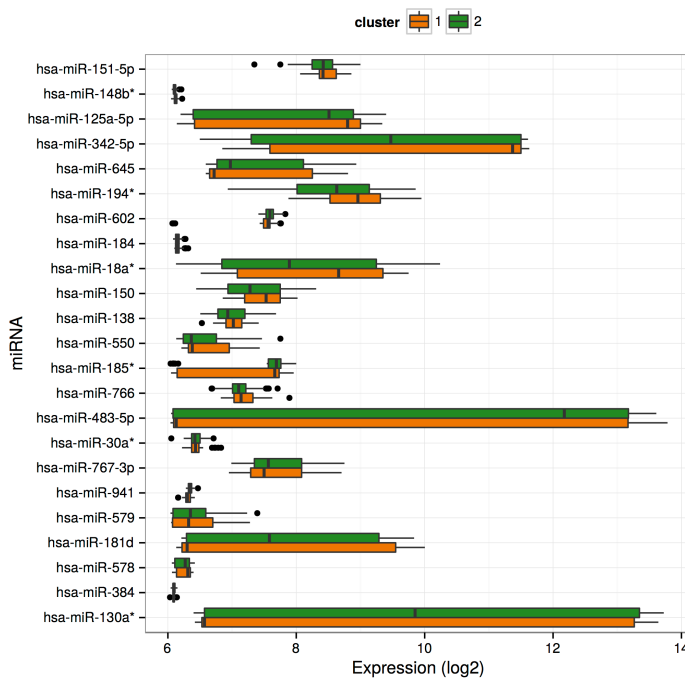

Supplement: MOL2-9-155-s004.pdf [file MOL2-9-155-s004.pdf]
